# Supplementary material for: Biology and ecology of the lionfish Pterois volitans/Pterois miles as invasive alien species: a review
Source: PeerJ. 2023 Jul 25;11:e15728. doi: 10.7717/peerj.15728 (PMC10377442; doi:10.7717/peerj.15728)
Supplement: Supplemental Information 3 [file peerj-11-15728-s003.xlsx]

## Sheet: Items and studies
		Morris and Akins (2009)	Sandel (2011)	Muñoz et al. (2011)	McCleery (2011)	Valdez-Moreno et al. (2012)	Cabrera (2014)	García (2015)	Pantoja (2016)	Arredondo-Chávez et al. (2016)	Cobián-Rojas et al. (2016)	Hackerot et al. (2017)	Chevalier (2017)	Pantoja et al. (2017)	Sancho et al. (2018)	Peake et al. (2018)	Aguilar-Medrano and Vega-Cendejas (2020)	Santamaria et al. (2020)	Dahl et al. (2017)
Pomacentridae	13	1	1		1		1	1	1	1	1	1	1	1	1	1			Tabla
Gobiidae	11	1			1	1	1	1	1		1		1	1	1			1
Labridae	10	1	1					1	1	1	1	1		1	1	1
Scaridae	8			1			1	1	1	1	1	1		1
Serranidae	7	1	1	1	1											1	1	1
Mullidae	5	1			1			1			1		1
Blennidae	4	1	1		1										1
Apogonidae	3	1				1												1
Acanthuridae	2		1					1
Haemulidae	2			1											1
Holocentridae	2						1						1
Grammatidae	2	1									1
Atherinidae	1	1
Monacanthidae	1	1
Labrisomidae	1														1
Carangidae	1			1
Microdesmidae	1																	1
Decapoda	17	1	1	1	1	1	1	1	1	1	1		1	1	1	1	1	1	1
Stomatopoda	10	1	1	1		1	1		1	1	1				1			1
Mysida	5						1	1			1			1	1
Isopoda	5	1					1			1				1	1
Amphipoda	2														1			1
Euphausiacea	1					1
Cirripedia*	1			1
Cephalopoda	7	1		1			1	1	1		1					1
Gastropoda	4									1					1	1	1
Bivalvia	2			1													1
Algas	2		1											1
Thalassia testudinum	1		1
Syringodium filiforme	1		1
